# Supplementary material for: Porous Structural Properties of K or Na-Co Hexacyanoferrates as Efficient Materials for CO2 Capture
Source: MDPI journal article supplement (doi:10.3390/ma16020608), 2023-01-08
Supplement: s1 [file s1]

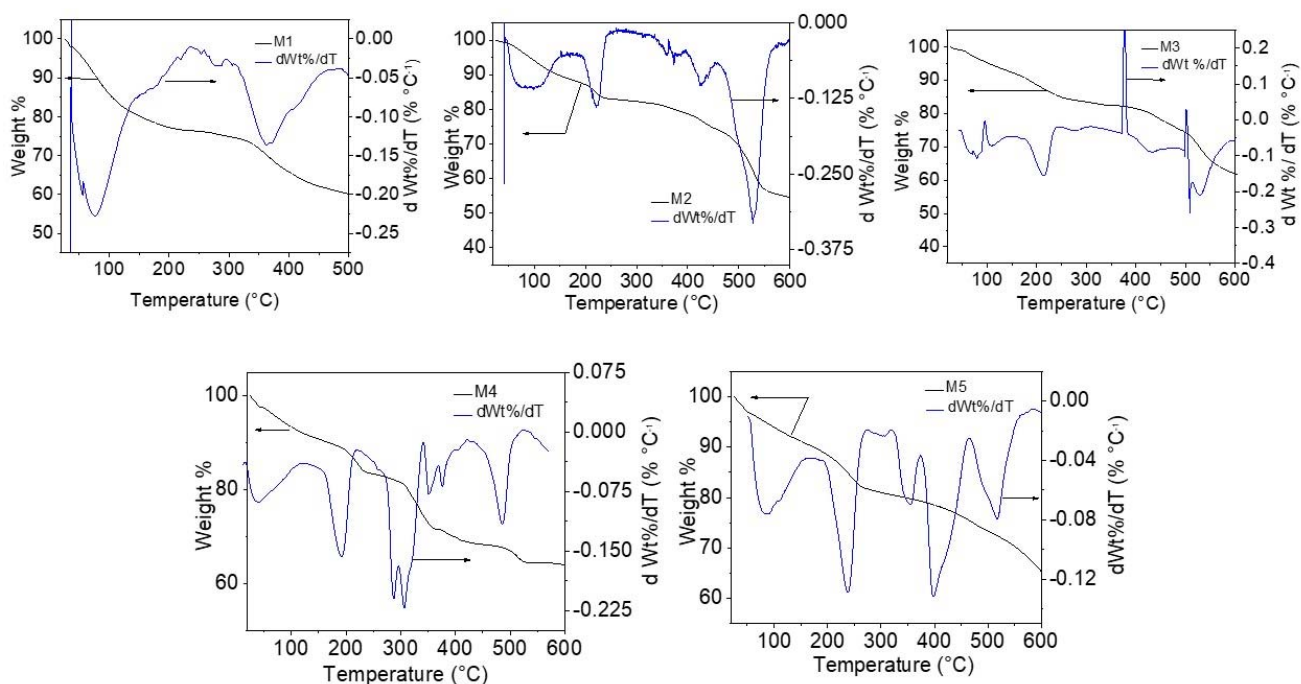

**Figure S1.** TGA plots (as Weight % loss and first derivative) of samples M1-M5 of CoHCFs.

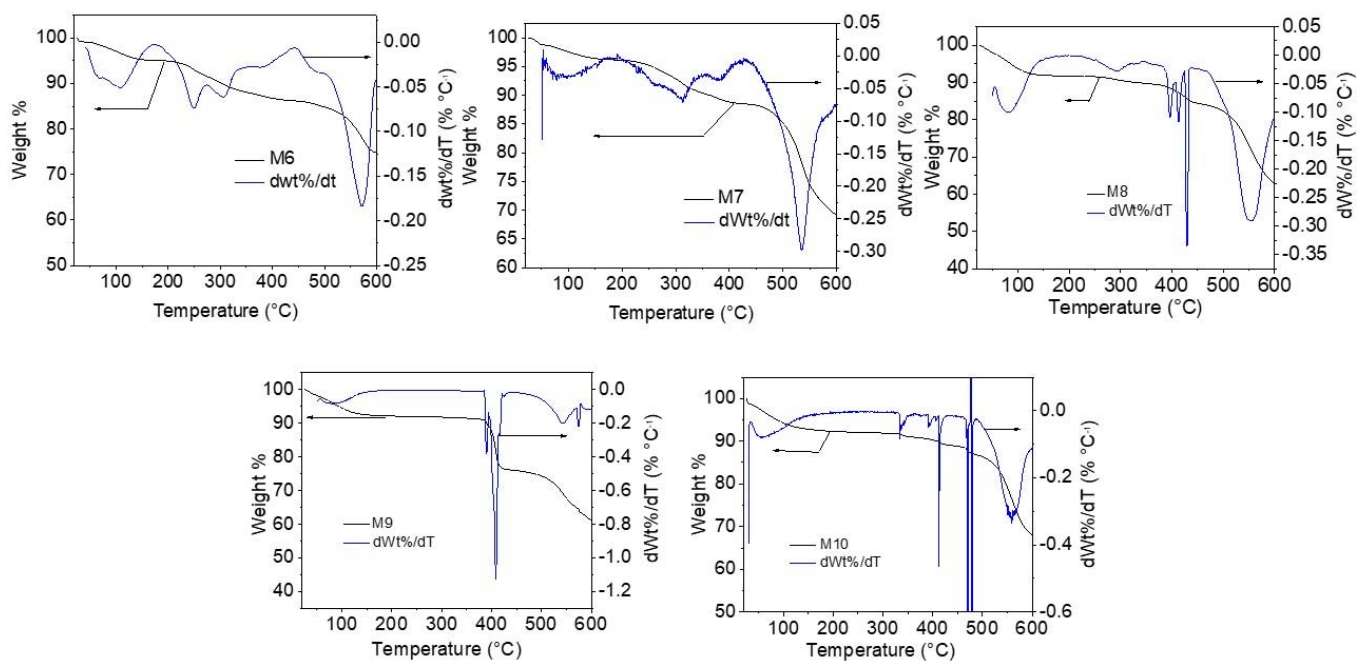

**Figure S2.** TGA plots (as Weight % loss and first derivative) of samples M6-M10 of CoHCFs.

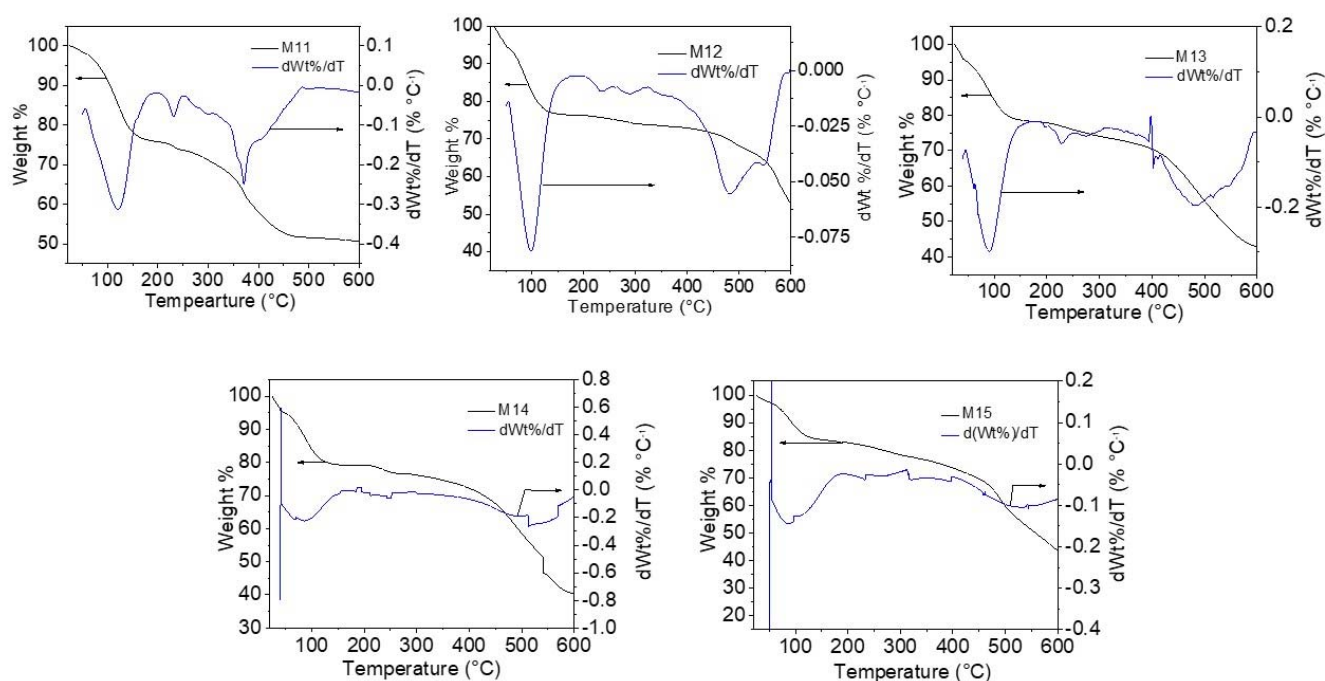

**Figure S3.** TGA plots (as Weight % loss and first derivative) of samples M11-M15 of CoHCFs.

#### XRD Rietveld refinement data on sample M6 (identified as JM57).

##### Refinement final output indices for single spectra:

Datafile Copia de JM57.txt : Rwp: 0.027154693, Rp: 0.020641273, Rwpnb: 0.117103845, Rwpnb1: 0.047824994, Rwpnb2: 0.028283723, Rpnb: 0.1506347Rpnb1: 0.04872347Rpnb2: 0.022067115

##### Rietveld refinement parameters:

$a = 10.056(2)$        $\alpha = 89.96(9)$   
 $b = 10.078(2)$        $\beta = 88.47(2)$   
 $c = 10.070(3)$        $\gamma = 90.39(9)$   
 $R_{exp} (\%) = 1.750733$

**Table S1.** XRD Atomic coordinates of sample M6.

| ATOM | x           | y                          | z                           | Biso Factor  | Occupancy |
|------|-------------|----------------------------|-----------------------------|--------------|-----------|
| K0   | 0.21339537  | 0.26930714                 | 0.78935                     | 0.78935      | 1         |
| K1   | 0.2496001   | 0.75391525                 | 0.78258544                  | 0.0046095275 | 1         |
| K2   | 0.24240327  | 0.7701745                  | 0.2682679                   | 0.004609286  | 1         |
| K3   | 0.21683615  | 0.24036963                 | 0.21854377                  | 0.0046096193 | 1         |
| K4   | 0.71135676  | 0.25506827                 | 0.26587352                  | 0.004609263  | 1         |
| K5   | 0.70397973  | 0.756127                   | 0.25189558                  | 0.004609728  | 1         |
| K6   | 0.6954931   | 0.7754539                  | 0.77313817                  | 0.0046092668 | 1         |
| K7   | 0.69231606  | 0.24304779                 | 0.7043417                   | 0.0046095457 | 1         |
| Fe8  | 0.007862565 | $2.6617525 \times 10^{-4}$ | $-1.7655495 \times 10^{-4}$ | 0.0046102116 | 1         |
| Fe9  | 0.013405314 | 0.4905588                  | 0.4670046                   | 0.00461002   | 1         |

|      |                            |                            |                           |              |   |
|------|----------------------------|----------------------------|---------------------------|--------------|---|
| Fe10 | 0.50426894                 | 0.0016125675               | 0.47941646                | 0.0046095983 | 1 |
| Fe11 | 0.47650135                 | 0.5025435                  | −0.0011604204             | 0.0046108235 | 1 |
| Co12 | 0.47473544                 | 0.01544629                 | 0.008525457               | 0.0046102614 | 1 |
| Co13 | 0.49559                    | 0.51086295                 | 0.5130797                 | 0.0046096933 | 1 |
| Co14 | $7.144763 \times 10^{-4}$  | 0.013408481                | 0.5082449                 | 0.0046090684 | 1 |
| Co15 | $6.7425007 \times 10^{-4}$ | 0.5076396                  | 0.008664027               | 0.0046099504 | 1 |
| C16  | 0.51991403                 | 0.19398375                 | −0.0027277668             | 0.0046093063 | 1 |
| C17  | 0.493107                   | 0.5159492                  | −0.004348543              | 0.0046094134 | 1 |
| C18  | 0.0036056023               | $7.6885894 \times 10^{-4}$ | 0.8442555                 | 0.0046093212 | 1 |
| C19  | 0.77849215                 | $1.5382229 \times 10^{-4}$ | 0.0026891972              | 0.004609467  | 1 |
| C20  | 0.49899247                 | 0.0033021613               | 0.6528794                 | 0.0046090805 | 1 |
| C21  | 0.20132203                 | 0.003101261                | $9.511535 \times 10^{-4}$ | 0.0046094847 | 1 |
| C22  | 0.53107595                 | 0.80303895                 | 0.47454295                | 0.0046095494 | 1 |
| C23  | 0.5035077                  | 0.2395549                  | 0.41985938                | 0.0046090656 | 1 |
| C24  | 0.0037762842               | 0.4025754                  | 0.26357687                | 0.0046095867 | 1 |
| C25  | 0.8343898                  | 0.53006595                 | 0.51570225                | 0.004609332  | 1 |
| C26  | 0.4736673                  | 0.57889044                 | 0.22773653                | 0.0046094237 | 1 |
| C27  | 0.15110737                 | 0.49002242                 | 0.5022098                 | 0.0046090614 | 1 |
| C28  | 0.0052313176               | 0.21458119                 | 0.45735332                | 0.004608982  | 1 |
| C29  | $2.9247883 \times 10^{-4}$ | 0.7822422                  | 0.26811823                | 0.0046094405 | 1 |
| C30  | 0.47687852                 | 0.0010089532               | 0.32254997                | 0.0046087657 | 1 |
| C31  | 0.28786176                 | $1.564865 \times 10^{-4}$  | 0.5074434                 | 0.004609527  | 1 |

| ATOM | x                           | y             | z                         | Biso Factor  | Occupancy |
|------|-----------------------------|---------------|---------------------------|--------------|-----------|
| C32  | $-9.5801783 \times 10^{-4}$ | 0.0013666921  | 0.1868362                 | 0.004609006  | 1         |
| C33  | 0.6270393                   | −0.0017123559 | 0.51883554                | 0.004609003  | 1         |
| C34  | 0.004478851                 | 0.97109765    | −0.009933286              | 0.004609334  | 1         |
| C35  | $3.31533 \times 10^{-4}$    | 0.25316003    | −0.0027350863             | 0.0046091643 | 1         |
| C36  | 0.48826376                  | 0.4708269     | 0.8599329                 | 0.0046095187 | 1         |
| C37  | 0.23741168                  | 0.6082885     | 0.004991114               | 0.004609309  | 1         |
| C38  | $-7.6391 \times 10^{-4}$    | 0.51240784    | 0.628015                  | 0.0046090637 | 1         |
| C39  | 0.6518778                   | 0.483303      | $4.224629 \times 10^{-4}$ | 0.0046091457 | 1         |
| N40  | 0.7013715                   | 0.0079332935  | 0.0032429472              | 0.004609518  | 1         |
| N41  | −0.0015269169               | 0.028602712   | 0.67092264                | 0.004609163  | 1         |
| N42  | 0.5344147                   | 0.7771988     | 0.005029325               | 0.0046091895 | 1         |

|     |              |                            |               |              |   |
|-----|--------------|----------------------------|---------------|--------------|---|
| N43 | 0.5586271    | 0.20617616                 | −0.0044596605 | 0.0046092677 | 1 |
| N44 | 0.4797129    | 0.001539663                | 0.8114993     | 0.0046088947 | 1 |
| N45 | 0.28558052   | $3.3445022 \times 10^{-4}$ | 0.010179597   | 0.004609405  | 1 |
| N46 | 0.7185487    | 0.5151947                  | 0.48919123    | 0.0046096263 | 1 |
| N47 | −0.002440368 | 0.56496763                 | 0.22910292    | 0.0046093827 | 1 |
| N48 | 0.44147006   | 0.27255192                 | 0.5434033     | 0.004608775  | 1 |
| N49 | 0.48737404   | 0.61859256                 | 0.4524773     | 0.00460903   | 1 |
| N50 | 0.50129056   | 0.42573187                 | 0.27916667    | 0.004609422  | 1 |
| N51 | 0.3200124    | 0.5224988                  | 0.48776066    | 0.004609317  | 1 |
| N52 | 0.22760499   | 0.0049257716               | 0.48717323    | 0.0046098065 | 1 |
| N53 | 0.49435413   | 0.020174203                | 0.16728099    | 0.0046090544 | 1 |
| N54 | 0.0014522229 | 0.76633227                 | 0.51911014    | 0.0046089506 | 1 |
| N55 | 0.001489375  | 0.21474767                 | 0.45598373    | 0.0046089897 | 1 |
| N56 | 0.011848602  | 0.0013979856               | 0.29151845    | 0.0046093957 | 1 |
| N57 | 0.8330878    | $3.1203078 \times 10^{-4}$ | 0.48224202    | 0.004609227  | 1 |
| N58 | 0.22026938   | 0.45513877                 | 0.004069938   | 0.0046092514 | 1 |
| N59 | 0.50650257   | 0.52954936                 | 0.6894973     | 0.0046090363 | 1 |
| N60 | 0.0023961428 | 0.2575178                  | 0.0066635218  | 0.004609438  | 1 |
| N61 | 0.0011668742 | 0.64178675                 | −0.0012996352 | 0.0046094535 | 1 |
| N62 | 0.010218649  | 0.47992063                 | 0.80811375    | 0.0046089734 | 1 |
| N63 | 0.7910187    | 0.515877                   | 0.0033978862  | 0.0046094167 | 1 |

**Table S2.** XPS binding energy assignments of samples M1, M6 and M11 of CoHCFs.

| Core level | M1        |                                                            |               | M6        |                                                           |        | M11       |                                                           |        |
|------------|-----------|------------------------------------------------------------|---------------|-----------|-----------------------------------------------------------|--------|-----------|-----------------------------------------------------------|--------|
|            | B.E. (eV) | Assignment                                                 | Ref.          | B.E. (eV) | Assignment                                                | Ref.   | B.E. (eV) | Assignment                                                | Ref.   |
| C 1s       | 283.48    | CO-Co                                                      | [1]           | 283.55    | C-Fe <sup>2+</sup>                                        | [2]    | 283.13    | Tape                                                      |        |
|            | 283.50    | C-Fe <sup>2+</sup>                                         | [2]           | 284.47    | C(elemental)                                              | [3]    | 283.77    | C-Fe <sup>2+</sup>                                        | [2]    |
|            | 284.53    | C (elemental)/Co                                           | [3]           | 285.60    | Adventitious                                              | [2]    | 284.03    | C-Fe <sup>3+</sup>                                        | [2]    |
|            | 285.4     | Adventitious                                               | [2]           | 287.44    | KCN                                                       | [2]    | 285.04    | Adventitious                                              |        |
|            | 287.42    | Co(CN) <sub>x</sub>                                        | Present study |           |                                                           |        |           |                                                           |        |
| O 1s       | 531.4     | Co(NO <sub>3</sub> ) <sub>2</sub>                          | [4]           | 530       | CoO                                                       | [5]    | 530.91    | Fe <sub>x</sub> O <sub>y</sub>                            | [6]    |
|            | 535.4     | H <sub>2</sub> O                                           | [7]           | 531.3     | Co(NO <sub>3</sub> ) <sub>x</sub>                         | [8]    | 531.88    | Co(NO <sub>3</sub> ) <sub>x</sub>                         | [9]    |
|            |           |                                                            |               | 532.58    | H <sub>2</sub> O                                          | [10]   | 532.77    | H <sub>2</sub> O                                          | [5]    |
|            |           |                                                            |               | 532.3     | KNO <sub>3</sub>                                          | [11]   |           |                                                           |        |
| N 1s       | 396.53    | N-Co <sup>2+</sup>                                         | [2]           | 397.30    | N-Co <sup>2+</sup>                                        | [2]    | 396.55    | Co <sub>x</sub> N <sub>y</sub>                            | [2]    |
|            | 396.95    | N-Co <sup>3+</sup>                                         | [2]           | 397.76    | N-Co <sup>3+</sup>                                        | [2]    | 397.21    | N-Co <sup>2+</sup>                                        | [12]   |
|            | 400.88    | Co(NO <sub>3</sub> ) <sub>x</sub>                          | [4]           | 401.79    | Co(NO <sub>3</sub> ) <sub>x</sub>                         | [4]    | 397.7     | N-Co <sup>3+</sup>                                        | [2]    |
|            |           |                                                            |               | 406.7     | KNO <sub>3</sub>                                          | [11]   | 398.86    | Satellite                                                 |        |
| Na 1s      | 1071.34   | Na <sub>n</sub> Co <sup>2+,3+</sup> [Fe(CN) <sub>6</sub> ] | [2]           |           |                                                           |        |           |                                                           |        |
| K 2p       | ---       |                                                            |               | 292.41    | K <sub>n</sub> Co <sup>2+,3+</sup> [Fe(CN) <sub>6</sub> ] | [2]    | 292.62    | K <sub>n</sub> Co <sup>2+,3+</sup> [Fe(CN) <sub>6</sub> ] | [2]    |
|            | ---       |                                                            |               | 293.55    | Satellite                                                 |        | 291.74    | Satellite                                                 |        |
|            | ---       |                                                            |               | ---       |                                                           |        | 298.71    | Satellite                                                 | [2]    |
| Co 2p      | 777.57    | Satellite                                                  |               | 781.50    | Satellite                                                 |        | 783.7     | Auger Fe                                                  |        |
|            | 780.68    | N-Co <sup>2+</sup>                                         | [4,13]        | 781.90    | N-Co <sup>2+</sup>                                        | [4,13] | 785.54    | N-Co <sup>2+</sup>                                        | [4,13] |
|            | 780.80    | Satellite                                                  |               | 783.58    | N-Co <sup>3+</sup>                                        | [14]   | 786.36    | N-Co <sup>3+</sup>                                        | [14]   |
|            | 783.59    | N-Co <sup>3+</sup>                                         | [14]          | 783.7     | Auger Fe                                                  |        | 789.01    | Satellite                                                 |        |
|            | 783.7     | Auger Fe                                                   |               | 787.68    | Satellite                                                 |        | 791.6     | Satellite                                                 |        |
|            | 787.03    | Satellite                                                  |               |           |                                                           |        | 791.69    | Satellite                                                 |        |
| Fe 2p      | 707.34    | C-Fe <sup>2+</sup>                                         | [15]          | 708.230   | Fe <sup>0</sup> /Satellite                                | [16]   | 711.7     | Fe <sub>x</sub> O <sub>y</sub>                            | [17]   |
|            | 712.7     | Auger Co                                                   |               | 709.230   | C-Fe <sup>2+</sup>                                        | [15]   | 712.72    | C-Fe <sup>2+</sup>                                        | [15]   |
|            | 716.54    | Satellite                                                  |               | 709.490   | C-Fe <sup>2+</sup>                                        | [15]   | 713.97    | Auger Co                                                  |        |
|            | 718.84    | Satellite                                                  |               | 713.700   | Auger Co                                                  |        | 715.27    | C-Fe <sup>3+</sup>                                        | [15]   |
|            | 721.34    | Satellite                                                  |               | 716.596   | Satellite                                                 |        | 718.42    | Satellite                                                 |        |
|            | 722.57    | Satellite                                                  |               | 722.145   | Satellite                                                 |        | 725.15    | Satellite                                                 |        |

## References

- D.A. Wesner, G. Linden, H.P. Bonzel, Alkali promotion on cobalt: Surface analysis of the effects of potassium on carbon monoxide adsorption and Fischer-Tropsch reaction, *Appl. Surf. Sci.* **1986**, 26, 335–356. [https://doi.org/10.1016/0169-4332\(86\)90074-7](https://doi.org/10.1016/0169-4332(86)90074-7).
- N.G. Vannerberg, The ESCA-spectra of sodium and potassium cyanide and of the sodium and potassium salts of the hexacyanometallates of the first transition metal series., *Chem. Scr.* **1976**, 9, 122–126.
- D.N. Belton, S.J. Schmieg, Electron spectroscopic identification of carbon species formed during diamond growth, *J. Vac. Sci. Technol. A Vacuum, Surfaces, Film.* **1990**, 8, 2353–2362. <https://doi.org/10.1116/1.576697>.
- C.A. Strydom, H.J. Strydom, X-ray photoelectron spectroscopy studies of some cobalt(II) nitrate complexes, *Inorganica Chim. Acta.* **1989**, 159, 191–195. [https://doi.org/10.1016/S0020-1693\(00\)80566-6](https://doi.org/10.1016/S0020-1693(00)80566-6).
- V.I. Nefedov, D. Gati, B.F. Dzhurinskii, N.P. Sergushin, Y.V. Salyn, [dataset] A. V. Naumkin, A. Kraut-Vass, S. W. Gaarenstroom, C. J. Powell, NIST X-ray Photoelectron Spectroscopy Database, NIST Standard Reference Database 20, v4.1, 2012., *Zhurnal Neorg. Khimii.* **1975**, 20, 2307–2314. <https://doi.org/http://dx.doi.org/10.18434/T4T88K>.
- E. Paparazzo, XPS and Auger Spectroscopy on mixtures of the oxides SiO<sub>2</sub>, Al<sub>2</sub>O<sub>3</sub>, Fe<sub>2</sub>O<sub>3</sub>, and Cr<sub>2</sub>O<sub>3</sub>, *J. Electron Spectros. Relat. Phenomena.* **1987**, 43, 97–112.
- P.D. Schulze, S.L. Shaffer, R.L. Hance, D.L. Utley, Adsorption of water on rhenium studied by XPS, *J. Vac. Sci. Technol. A Vacuum, Surfaces, Film.* **1983**, 1, 97–99. <https://doi.org/10.1116/1.572321>.
- J.P. Bonnelle, J. Grimblot, A. D'huysser, Influence de la polarisation des liaisons sur les spectres esca des oxydes de cobalt, *J. Electron Spectros. Relat. Phenomena.* **1975**, 7, 151–162. [https://doi.org/10.1016/0368-2048\(75\)80047-8](https://doi.org/10.1016/0368-2048(75)80047-8).
- P. Porta, R. Dragone, G. Fierro, M. Inversi, M. Lo Jacono, G. Moretti, Preparation and characterisation of cobalt-copper hydroxysalts and their oxide products of decomposition, *J. Chem. Soc. Faraday Trans.* **1992**, 88, 311–319. <https://doi.org/10.1039/FT9928800311>.

10. J. Russat, Characterization of Polyamic Acid/Polyimide Films in the Nanometric Thickness Range from Spin-deposited Poly amic Acid, *Surf. Interface Anal.* **1988**, *11*, 414–420.
11. V.I. Nefedov, Y. V. Salyn, G. Leonhardt, R. Scheibe, A comparison of different spectrometers and charge corrections used in X-ray photoelectron spectroscopy, *J. Electron Spectros. Relat. Phenomena.* **1977**, *10*, 121–124. [https://doi.org/10.1016/0368-2048\(77\)85010-X](https://doi.org/10.1016/0368-2048(77)85010-X).
12. B.M. Biwer, S.L. Bernasek, Electron spectroscopic study of the iron surface and its interaction with oxygen and nitrogen, *J. Electron Spectros. Relat. Phenomena.* **1986**, *40*, 339–351. [https://doi.org/10.1016/0368-2048\(86\)80044-5](https://doi.org/10.1016/0368-2048(86)80044-5).
13. B.J. Tan, K.J. Klabunde, P.M.A. Sherwood, XPS Studies of Solvated Metal Atom Dispersed Catalysts. Evidence for Layered Cobalt–Manganese Particles on Alumina and Silica, *J. Am. Chem. Soc.* **1991**, *113*, 855–861. <https://doi.org/10.1021/ja00003a019>.
14. R.O. Lezna, R. Romagnoli, N.R. De Tacconi, K. Rajeshwar, Cobalt hexacyanoferrate: Compound stoichiometry, infrared spectroelectrochemistry, and photoinduced electron transfer, *J. Phys. Chem. B.* **2002**, *106*, 3612–3621. <https://doi.org/10.1021/jp013991r>.
15. K.B. Yatsimirskii, V. V. Nemoshkalenko, Y.P. Nazarenko, V.G. Aleshin, V. V. Zhilinskaya, N.A. Tomashevsky, Use of X-ray photoelectron and Mössbauer spectroscopies in the study of iron pentacyanide complexes, *J. Electron Spectros. Relat. Phenomena.* **1977**, *10*, 239–245. [https://doi.org/10.1016/0368-2048\(77\)85023-8](https://doi.org/10.1016/0368-2048(77)85023-8).
16. R. V. Siriwardane, J.M. Cook, Interactions of SO<sub>2</sub> with sodium deposited on silica, *J. Colloid Interface Sci.* **1985**, *108*, 414–422. [https://doi.org/10.1016/0021-9797\(85\)90280-2](https://doi.org/10.1016/0021-9797(85)90280-2).
17. K. Kishi, Adsorption of ethylenediamine on clean and oxygen covered Fe/Ni(100) surfaces studied by XPS, *J. Electron Spectros. Relat. Phenomena.* **1988**, *46*, 237–247. [https://doi.org/10.1016/0368-2048\(88\)80022-7](https://doi.org/10.1016/0368-2048(88)80022-7).
